# Supplementary material
Source: PubMed Central journal article supplement (PMC4793672)
Supplement: prir014059.ww1_default.pdf [file prir014059.ww1_default.pdf]

## **Appendix: Supplementary data [posted as supplied by authors]**

### **Electronic search strategy (MEDLINE).**

1. exp Intensive Care/
2. exp Intensive Care Units/
3. exp Critical Care/
4. exp Critical Illness/
5. exp Respiration, Artificial/
6. exp Ventilators, Mechanical/
7. 1 or 2 or 3 or 4 or 5 or 6
8. exp Anti-Bacterial Agents/
9. exp Antibiotic Prophylaxis/
10. exp Amphotericin B/
11. exp Polymyxins/
12. exp Tobramycin/
13. exp Cefotaxime/
14. exp Antisepsis/
15. chlorhexidine.mp. or exp Chlorhexidine/
16. 8 or 9 or 10 or 11 or 12 or 13 or 14 or 15
17. exp Death/ or death.mp.
18. mortality.mp. or exp Hospital Mortality/ or exp Mortality/
19. 17 or 18
19. 7 and 16 and 19
21. (gut adj2 decont\$).mp. [mp=title, abstract, original title, name of substance word, subject heading word, protocol supplementary concept, rare disease supplementary concept, unique identifier]
22. (oral adj2 decont\$).mp. [mp=title, abstract, original title, name of substance word, subject heading word, protocol supplementary concept, rare disease supplementary concept, unique identifier]
23. (digestive adj2 decont\$).mp. [mp=title, abstract, original title, name of substance word, subject heading word, protocol supplementary concept, rare disease supplementary concept, unique identifier]
24. (orophar\$ adj2 decont\$).mp. [mp=title, abstract, original title, name of substance word, subject heading word, protocol supplementary concept, rare disease supplementary concept, unique identifier]

25. (oral adj2 antisept\$).mp. [mp=title, abstract, original title, name of substance word, subject heading word, protocol supplementary concept, rare disease supplementary concept, unique identifier]
26. (orophar\$ adj2 antisept\$).mp. [mp=title, abstract, original title, name of substance word, subject heading word, protocol supplementary concept, rare disease supplementary concept, unique identifier]
27. 21 or 22 or 23 or 24 or 25 or 26
28. 20 or 27
29. randomly.ab.
30. randomised.ab.
31. randomized.ab.
32. Clinical Trials as Topic/
33. randomized controlled trial.pt.
34. controlled clinical trial.pt.
35. trial.ti
36. 29 or 30 or 31 or 32 or 33 or 34 or 35
37. 28 and 36
29. limit 37 to yr="1984 - Current"

### Approach to studies with a 3 arm design.

Two control groups were used in the studies of Aerdt<sup>31</sup> and Bergmans<sup>44</sup>; these were combined as one. Palomar<sup>37</sup> used two intervention arms: SDD (with rantidine), and sucralfate alone; only the control and SDD groups were used. Verwaest<sup>42</sup> used two treatment arms: one with polymyxin-tobramycin-amphotericin and IV cefotaxime, and one with ofloxacin-amphotericin and IV ofloxacin. Only the ofloxacin-amphotericin treatment group was included, since this was the only group for which intention to treat data was available<sup>12</sup> This approach to these four studies is the same as that adopted by the Cochrane group.<sup>12</sup>

Scannapieco<sup>56</sup> applied chlorhexidine either once or twice per day and we combined these as a single intervention group, this approach has been taken by others.<sup>14,15</sup> Munro<sup>54</sup> used a two by two design around chlorhexidine and mechanical toothbrushing; since there was no effect of mechanical toothbrushing, we collapsed these groups to consider them as chlorhexidine or no chlorhexidine. Berry<sup>48</sup> had one group who received chlorhexidine, one bicarbonate and one control. We combined the bicarbonate and control group as a single control group; bicarbonate having been used as a control group in another included study.<sup>50</sup> These data were all obtained by communication with the respective authors and are presented below:

| <b>Berry<sup>48</sup></b>       | <b>Deaths</b> | <b>Total</b> |
|---------------------------------|---------------|--------------|
| Control                         | 17            | 78           |
| Bicarbonate                     | 13            | 76           |
| Chlorhexidine                   | 17            | 71           |
| <b>Munro<sup>54</sup></b>       | <b>Deaths</b> | <b>Total</b> |
| Control                         | 23            | 137          |
| Chlorhexidine                   | 34            | 138          |
| Toothbrushing                   | 24            | 135          |
| Chlorhexidine + Toothbrushing   | 35            | 137          |
| <b>Scannapieco<sup>56</sup></b> | <b>Deaths</b> | <b>Total</b> |
| Control                         | 9             | 59           |
| Chlorhexidine once per day      | 11            | 58           |
| Chlorhexidine twice per day     | 8             | 58           |

**Table A: Raw Outcome Data**

| <b>SDD Study (1<sup>st</sup> Author)</b>     | <b>Experimental Deaths</b> | <b>Total</b> | <b>Control Deaths</b> | <b>Total</b> | <b>Data Source</b>                                |
|----------------------------------------------|----------------------------|--------------|-----------------------|--------------|---------------------------------------------------|
| Aerdt <sup>31</sup>                          | 4                          | 28           | 12                    | 60           | Previous communication with authors <sup>12</sup> |
| Blair <sup>32</sup>                          | 24                         | 161          | 32                    | 170          | Published paper                                   |
| Boland <sup>33</sup>                         | 2                          | 32           | 4                     | 32           | Previous communication with authors <sup>12</sup> |
| Cockerill <sup>34</sup>                      | 8                          | 75           | 14                    | 75           | Published paper                                   |
| De Jonge <sup>18</sup>                       | 69                         | 466          | 107                   | 468          | Published paper                                   |
| De Smet <sup>19*</sup>                       | Adjusted values used       |              |                       |              | Published paper                                   |
| Jacobs <sup>35</sup>                         | 14                         | 45           | 23                    | 46           | Published paper                                   |
| Kreuger <sup>36</sup>                        | 52                         | 265          | 75                    | 262          | Published paper                                   |
| Palomar <sup>37</sup>                        | 14                         | 50           | 14                    | 49           | Previous communication with authors <sup>12</sup> |
| Rocha <sup>38</sup>                          | 27                         | 74           | 40                    | 77           | Previous communication with authors <sup>12</sup> |
| Sanchez-Garcia <sup>39</sup>                 | 51                         | 131          | 66                    | 140          | Published paper                                   |
| Stoutenbeek <sup>40</sup>                    | 42                         | 201          | 44                    | 200          | Published paper                                   |
| Ulrich <sup>41</sup>                         | 22                         | 55           | 33                    | 57           | Previous communication with authors <sup>12</sup> |
| Verwaest <sup>42</sup>                       | 47                         | 220          | 40                    | 220          | Previous communication with authors <sup>12</sup> |
| Winter <sup>43</sup>                         | 33                         | 91           | 40                    | 92           | Published paper                                   |
| <b>SOD Study (1<sup>st</sup> Author)</b>     | <b>Experimental Deaths</b> | <b>Total</b> | <b>Control Deaths</b> | <b>Total</b> | <b>Data Source</b>                                |
| Bergmans <sup>44</sup>                       | 25                         | 87           | 53                    | 139          | Published paper                                   |
| De Smet <sup>19*</sup>                       | Adjusted values used       |              |                       |              | Published paper                                   |
| Pugin <sup>45</sup>                          | 10                         | 38           | 11                    | 41           | Previous communication with authors <sup>12</sup> |
| Rios <sup>46</sup>                           | 18                         | 47           | 21                    | 49           | Published paper                                   |
| <b>Chlorhexidine (1<sup>st</sup> Author)</b> | <b>Experimental Deaths</b> | <b>Total</b> | <b>Control Deaths</b> | <b>Total</b> | <b>Data Source</b>                                |
| Bellissimo-Rodrigues <sup>47</sup>           | 35                         | 98           | 33                    | 96           | Published paper                                   |
| Berry <sup>48</sup>                          | 17                         | 71           | 28                    | 154          | Our communication with author                     |
| Cabov <sup>49</sup>                          | 1                          | 30           | 3                     | 30           | Published paper                                   |
| Fourrier 2000 <sup>50</sup>                  | 3                          | 30           | 7                     | 30           | Published paper                                   |
| Fourrier 2005 <sup>51</sup>                  | 31                         | 114          | 24                    | 114          | Published paper                                   |
| Koeman <sup>52</sup>                         | 49                         | 127          | 39                    | 130          | Previous communication with authors <sup>13</sup> |
| MacNaughton <sup>53</sup>                    | 29                         | 101          | 29                    | 93           | Previous communication with authors <sup>13</sup> |
| Munro <sup>54</sup>                          | 69                         | 275          | 47                    | 272          | Our communication with author                     |
| Panchabhai <sup>55</sup>                     | 78                         | 224          | 70                    | 247          | Published paper                                   |
| Scannapieco <sup>56</sup>                    | 19                         | 116          | 9                     | 59           | Our communication with author                     |
| Tantipong <sup>57</sup>                      | 36                         | 102          | 37                    | 105          | Published paper                                   |
